# Supplementary material for: Enhanced electrochemical performance of lamellar structured Co–Ni(OH)2/reduced graphene oxide (rGO) via hydrothermal synthesis
Source: Royal Society of Chemistry journal article supplement (doi:10.1039/c5ra23724f), 2016-01-01
Supplement: c5ra23724f1.pdf [file c5ra23724f1.pdf]

# Enhanced electrochemical performance of lamellar structured Co-Ni(OH)<sub>2</sub> /reduced Graphene Oxide (rGO) via hydrothermal synthesis

Sintayehu Nibret Tiruneh,<sup>‡a</sup> Bong Kyun Kang,<sup>‡a</sup> Quang Tran Ngoc,<sup>a</sup> and Dae Ho Yoon<sup>\*ab</sup>

<sup>a</sup> School of Advanced Materials Science and Engineering, Sungkyunkwan University, South Korea

<sup>b</sup> SKKU Advanced Institute of Nanotechnology (SAINT), Sungkyunkwan University, South Korea

<sup>‡</sup> S. Nibret Tiruneh and B. K. Kang contributed equally to this work.

\*Corresponding Author:

Dae Ho Yoon

Tel:+82-31-210-7361; Fax:+82-31-290-7410; Email: dhyoon@skku.edu

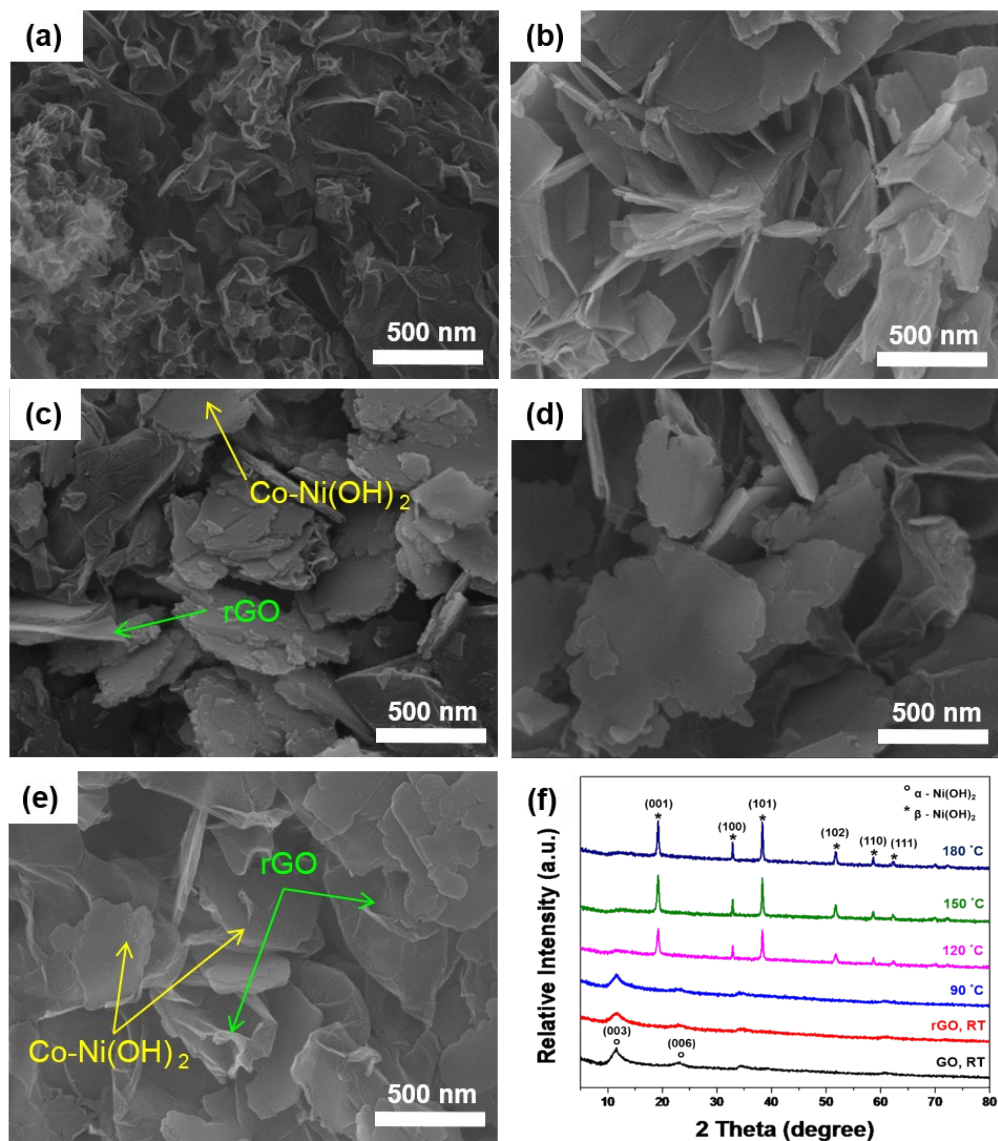

Fig. S1 SEM images of lamellar Co-Ni(OH)<sub>2</sub>/rGO composites at different hydrothermal synthesis temperatures: (a) RT, (b) 90 °C, (c) 120 °C (d) 150 °C, (e) 180 °C, and (f) their respective XRD patterns. All images are of lamellar Co-Ni(OH)<sub>2</sub>/rGO prepared at a GO to metal precursor ratio of 1:10 ratio for 10 h.

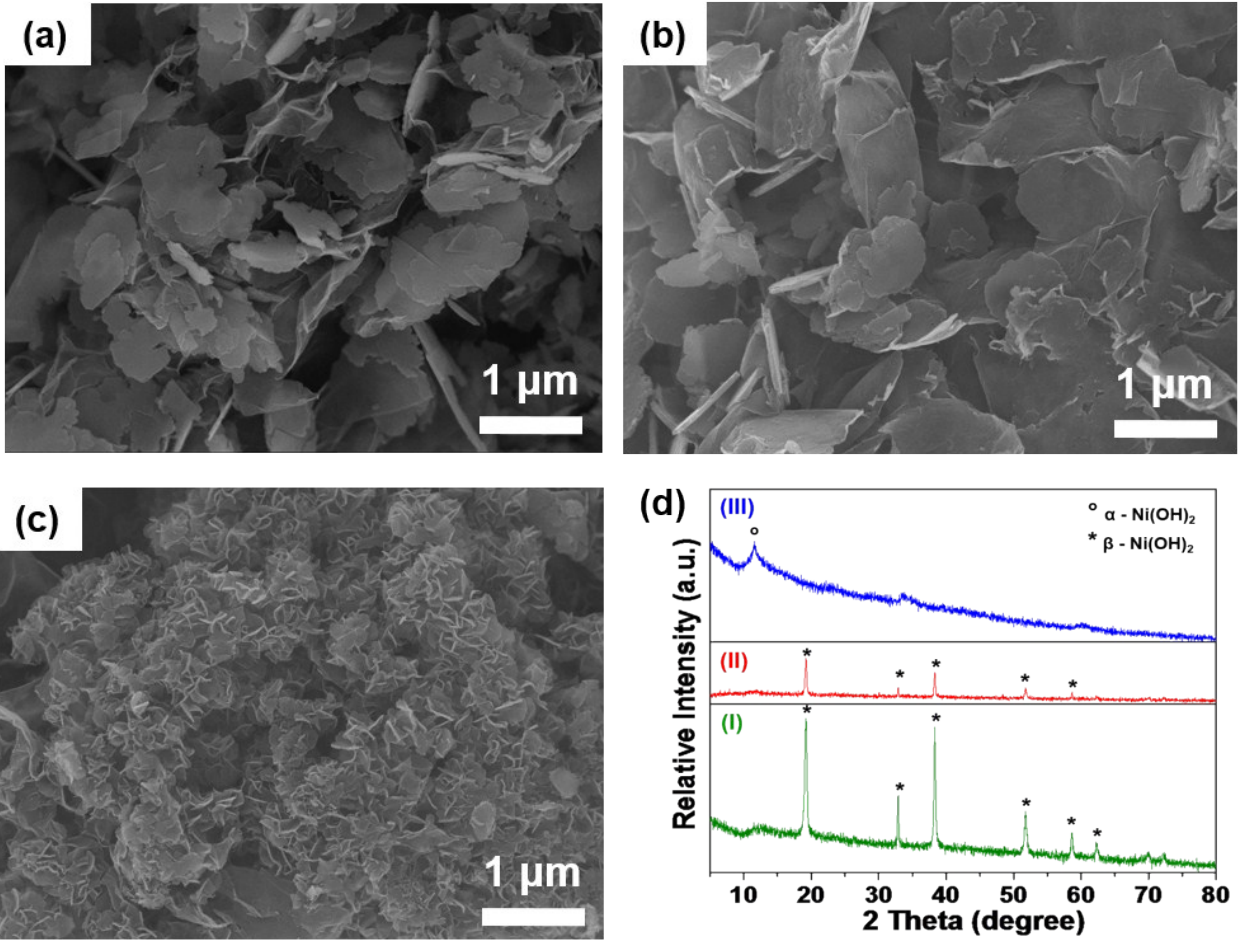

Fig. S2 SEM images of the as prepared lamellar Co-Ni(OH)<sub>2</sub>/rGO at 150 °C and different GO to metal precursor ratios of (a) 1:10, (b) 1:7.5, (C)1:5 and (d) their respective XRD patterns where I, II, and III indicate 1:10, 1: 7.5, and III is 1:5 ratios, respectively.

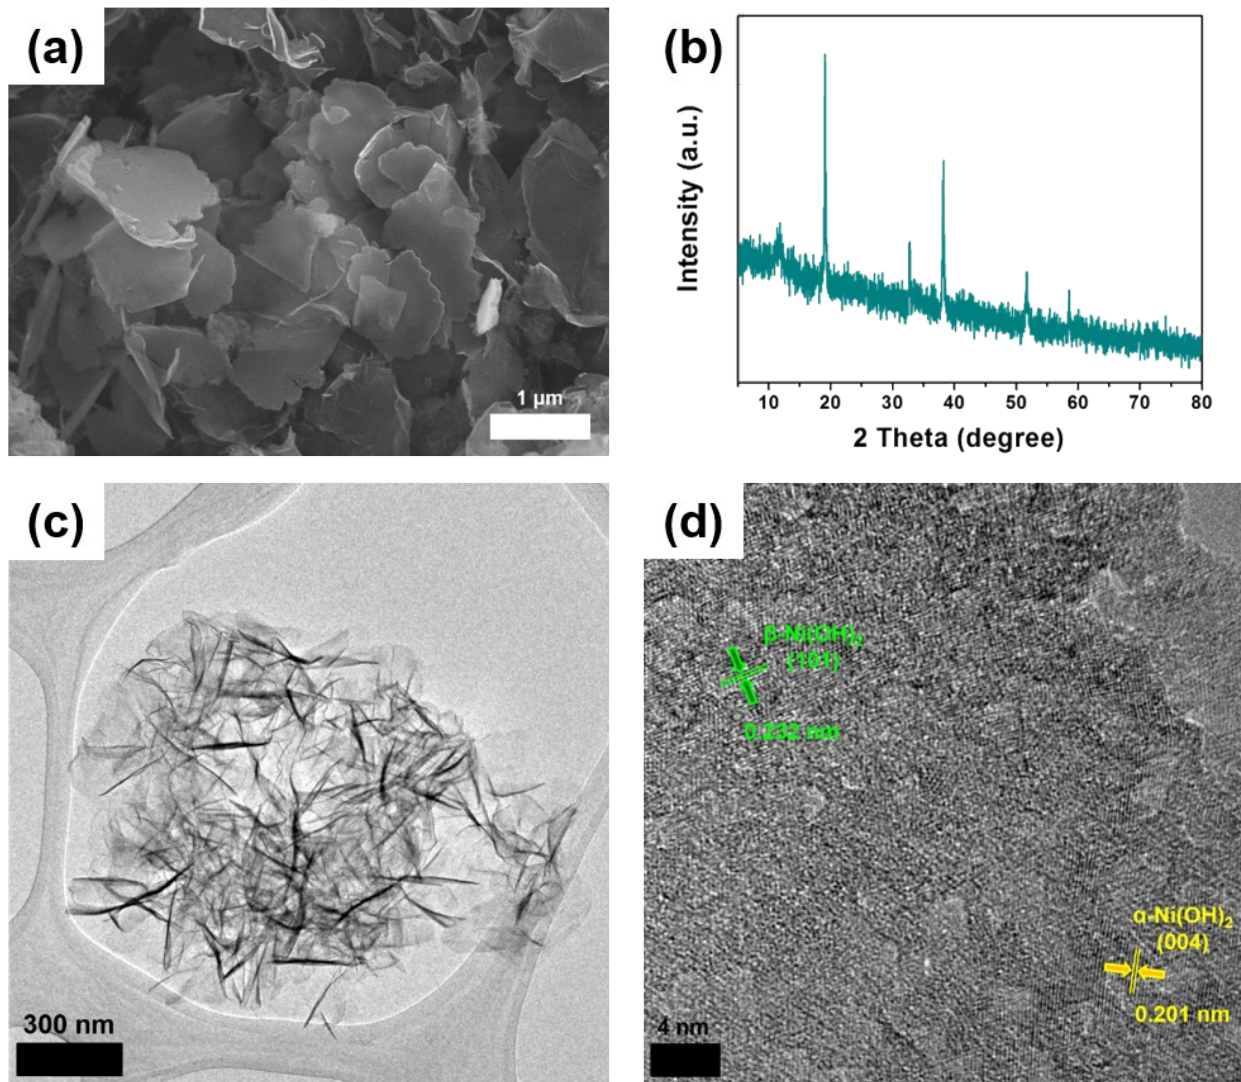

Fig. S3 (a) FESEM, (b) XRD, (c) TEM, and (d) HRTEM images of lamellar Co-Ni(OH)<sub>2</sub>/rGO structure synthesized at 150°C, 1:5 ratio, and 12 h.

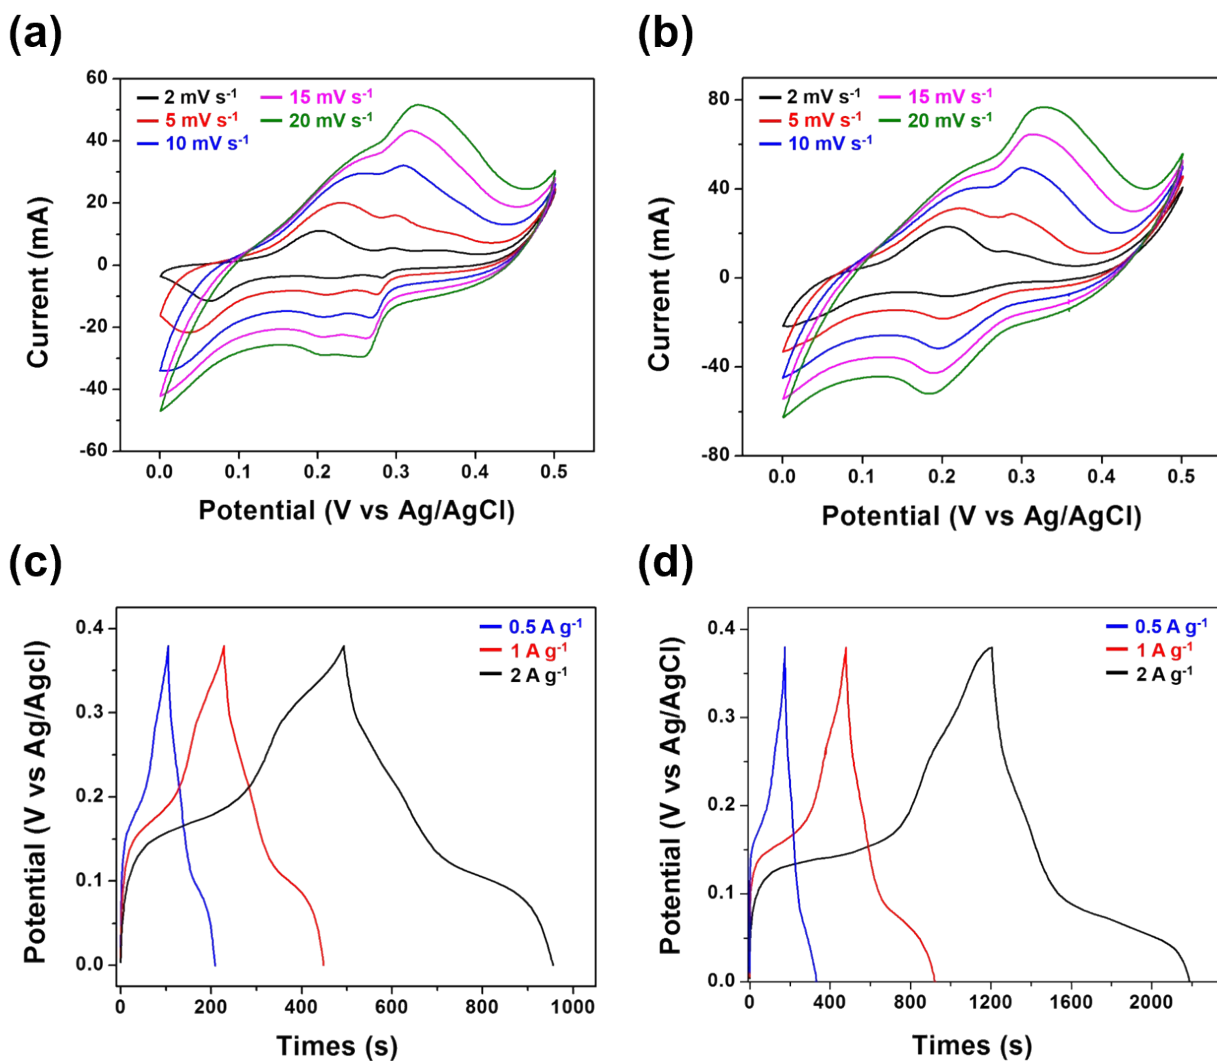

Fig. S4CV and GCD curves of lamellar Co-Ni(OH)<sub>2</sub>/rGO synthesized at 150°C and for 10 h in a GO to metal precursor ratios (a and c) 1:10 and (b and d) 1:5.

The specific capacitance of the electrodes was calculated on the basis of their CV and GCD curves

$$Cs = \frac{1}{ms(V_f - V_i)} \int_{V_i}^{V_f} I(V) dV$$

using the equations

and  $Cs = (I \times t) / (m \times \Delta V)$ , respectively, where  $Cs$  is

the specific capacitance of the electrode ( $F g^{-1}$ ),  $m$  is the mass of the electrode material ( $g$ ),  $s$  is potential scan rate ( $mV s^{-1}$ ),  $V_f$  and  $V_i$  are the integration limits of the voltammetric curve ( $V$ ),

and  $I(V)$  denotes the response current (mA) in the CV tests while  $I$  is the discharge current (mA),  $t$  is the discharge time (s), and  $\Delta V$  is the potential range (0.38 V) in the GCD tests.

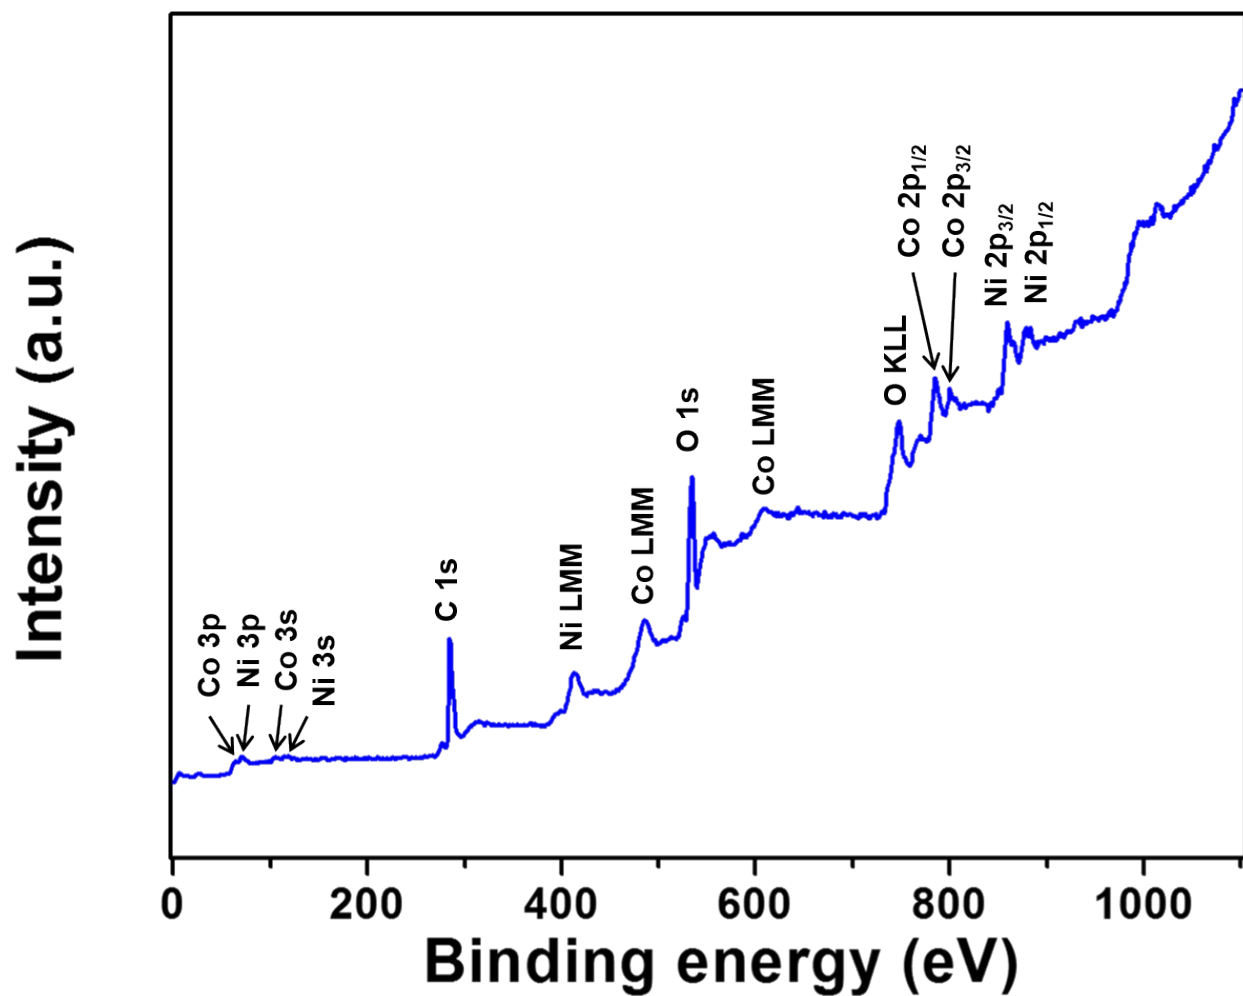

Fig. S5 XPS survey spectrum of lamellar Co-Ni(OH)<sub>2</sub>/rGO synthesized at 150°C, 1:5, and 12 h.

Table S1 Cs values based on CV curves of lamellar Co-Ni(OH)<sub>2</sub>/rGO composites synthesized at different hydrothermal synthesis temperatures for different scan rates.

| Specific Capacitance , Cs (F g <sup>-1</sup> ) |                   |       |        |        |        |
|------------------------------------------------|-------------------|-------|--------|--------|--------|
| Scan rate<br>(mV s <sup>-1</sup> )             | Temperature ( °C) |       |        |        |        |
|                                                | RT                | 90 °C | 120 °C | 150 °C | 180 °C |
| 20                                             | ~ 149             | ~ 160 | ~ 182  | ~ 327  | ~ 141  |
| 15                                             | ~ 255             | ~ 224 | ~ 257  | ~ 360  | ~ 170  |
| 10                                             | ~ 290             | ~ 253 | ~ 315  | ~ 404  | ~ 194  |
| 5                                              | ~ 335             | ~ 296 | ~ 408  | ~ 455  | ~ 226  |
| 2                                              | ~ 395             | ~ 349 | ~ 515  | ~ 500  | ~ 264  |

Table S2 Cs values based on CV and GCD curves of lamellar Co-Ni(OH)<sub>2</sub>/rGO composites synthesized at 150°C.

| Specific Capacitance , Cs (F g <sup>-1</sup> ) |                 |                   |                  |                 |
|------------------------------------------------|-----------------|-------------------|------------------|-----------------|
| Scan rate<br>(mV s <sup>-1</sup> )             | 1:5 ratio, 10 h | 1:7.5 ratio, 10 h | 1:10 ratio, 10 h | 1:5 ratio, 12 h |
| 2                                              | ~ 646           | ~ 521             | ~ 500            | ~ 617           |
| 5                                              | ~ 472           | ~ 396             | ~ 455            | ~ 539           |
| 10                                             | ~ 375           | ~ 333             | ~ 404            | ~ 416           |
| 15                                             | ~ 329           | ~ 292             | ~ 360            | ~ 344           |
| 20                                             | ~ 297           | ~ 265             | ~ 327            | ~ 294           |

(a) Cs vs (GO to metal precursor ratios and synthesis time) for different scan rates calculated from CV tests.

| Specific Capacitance , Cs (F g <sup>-1</sup> ) |                 |                   |                  |                 |
|------------------------------------------------|-----------------|-------------------|------------------|-----------------|
| Current density (A g <sup>-1</sup> )           | 1:5 ratio, 10 h | 1:7.5 ratio, 10 h | 1:10 ratio, 10 h | 1:5 ratio, 12 h |
| 0.5                                            | ~ 1294          | ~ 536             | ~ 611            | ~ 811           |
| 1                                              | ~ 1171          | ~ 530             | ~ 581            | ~ 784           |
| 2                                              | ~ 891           | ~ 461             | ~ 542            | ~ 730           |

(b) Cs vs (GO to metal precursor ratios and synthesis time) for different current density calculated from GCD tests.



Table S3 A comparison of Co-Ni(OH)<sub>2</sub>/rGO in this study with other cobalt and nickel based materials for supercapacitors

| Material                                              | Method of synthesis                            | Mass loading [mg cm <sup>-2</sup> ] | Cs [F g <sup>-1</sup> ] | Current density [A g <sup>-1</sup> ] | Remarks            | Reference  |
|-------------------------------------------------------|------------------------------------------------|-------------------------------------|-------------------------|--------------------------------------|--------------------|------------|
| Co-Ni(OH) <sub>2</sub> /rGO                           | Co precipitation followed by hydrothermal      | 4.5-5.5                             | 811                     | 0.5                                  | High mass loading  | This study |
| rGO/Co(OH) <sub>2</sub>                               | One-pot process at 95 °C                       | -                                   | 474                     | 1                                    | -                  | [1]        |
| Ni-Co binary hydroxide                                | Hydrolysis in the presence of a surfactant     | 1                                   | 1030                    | 3                                    | small mass loading | [2]        |
| Ni-Co binary hydroxide                                | Hydrolysis in the presence of a surfactant     | 2.8                                 | 804                     | 3                                    | small mass loading | [2]        |
| NiCo <sub>2</sub> O <sub>4</sub> @RGO                 | Hydrothermal                                   | 5.6–10.2                            | 737                     | 1                                    | -                  | [3]        |
| NiCo <sub>2</sub> O <sub>4</sub> -rGO                 | Hydrothermal (water-ethanol mixture)           | 3.5                                 | 882                     | 1                                    | Small mass loading | [4]        |
| Co(OH) <sub>2</sub> /graphene/Ni foam nano-electrodes | RF-PECVD and electrodeposition                 | -                                   | 693.8                   | 2                                    | -                  | [5]        |
| Co-Al LDHs/graphene nanosheets                        | Hydrothermal                                   | -                                   | 581.6                   | 2                                    | -                  | [6]        |
| NiCo <sub>2</sub> O <sub>4</sub> -RGO                 | Self-assembly and subsequent thermal treatment | 2                                   | 835                     | 1                                    | Small mass loading | [7]        |

## References

- 1 Z. Li, J. Wang, L. Niu, J. Sun, P. Gong, W. Hong and S. Yang, *J. Power Sources*, 2014, **245**, 224.
- 2 X. Sun, G. Wang, H. Sun, F. Lu, M. Yu, and J. Lian, *J. Power Sources*, 2013, **238**, 150.
- 3 G. He, L. Wang, H. Chen, X. Sun and X. Wang, *Mater. Lett.*, 2013, **98**, 164.
- 4 J. P. Wang, S. L. Wang, Z. C. Huang, Y. M. Yu and J. L. Liu, *Ceram. Int.*, 2014, **40**, 12751.
- 5 C. Zhao, X. Wang, S. Wang, Y. Wang, Y. Zhao and W. Zheng, *Int. J. Hydrogen Energy*, 2012, **37**, 11846.
- 6 S. Huang, G. N. Zhu, C. Zhang, W. W. Tjiu, Y. Y. Xia and T. Liu, *ACS Appl. Mater. Interfaces*, 2012, **4**, 2242.
- 7 H. W. Wang, Z. A. Hu, Y. Q. Chang, Y. L. Chen, H. Y. Wu, Z. Y. Zhang and Y. Y. Yang, *J. Mater. Chem.*, 2011, **21**, 10504.
